# Supplementary material
Source: Springer Nature journal article supplement (https://www.springermedizin.de/resource/supplementary/13014_2014_1137_MOESM1_ESM.pdf/9634972)
Supplement: MOESM1 [file 9634972]

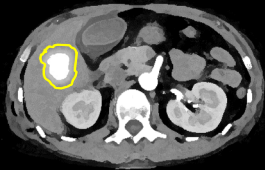

Contrast-enhanced CT  
for contouring target volumes.

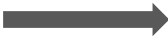

Iodine removal  
(Postprocessing)

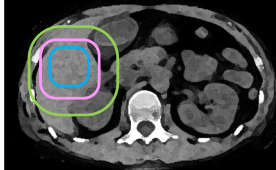

Virtual unenhanced CT  
for dose calculation.
